# Supplementary material for: Synthetic Optimization and MAPK Pathway Activation Anticancer Mechanism of Polyisoprenylated Cysteinyl Amide Inhibitors
Source: MDPI journal article supplement (doi:10.3390/cancers13225757), 2021-11-17

Supplementary S1:

Figure 6

**(B)**

Total BRaf-NSL-YHJ-2-27

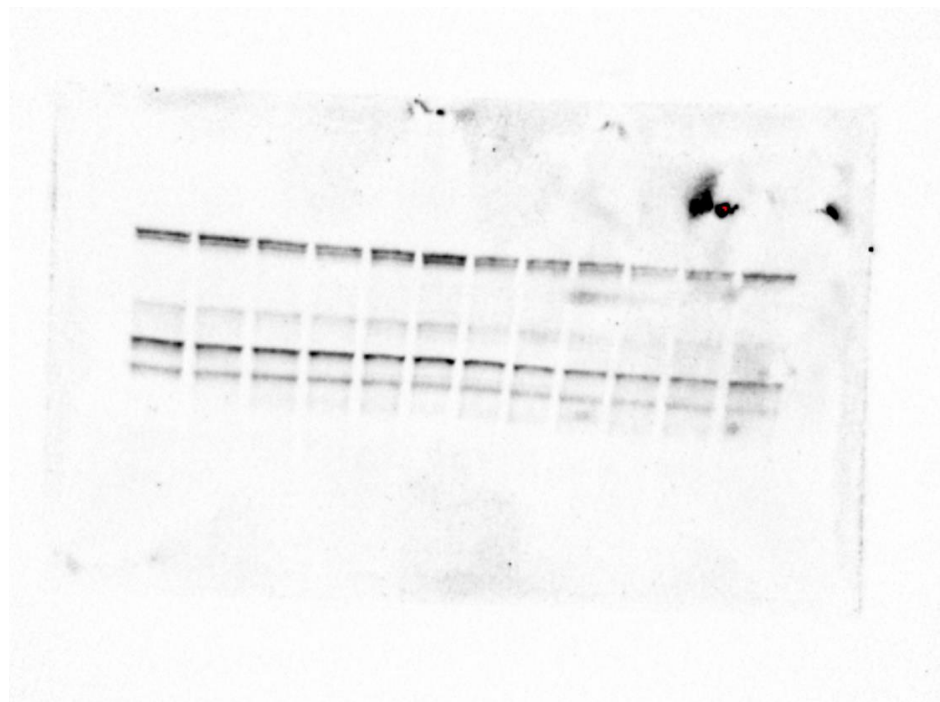

Control

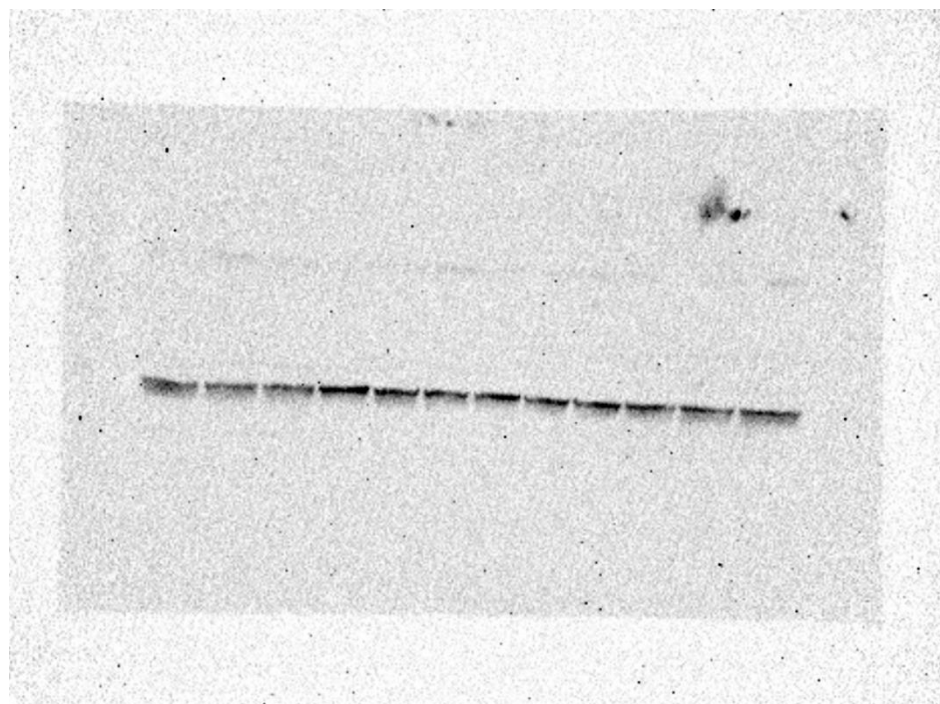

Total Braf-NSL-YHJ-2-62

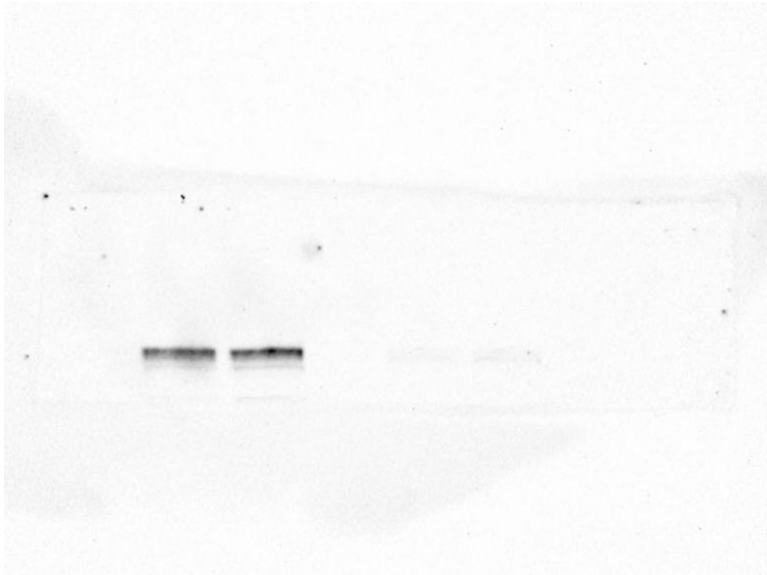

Control

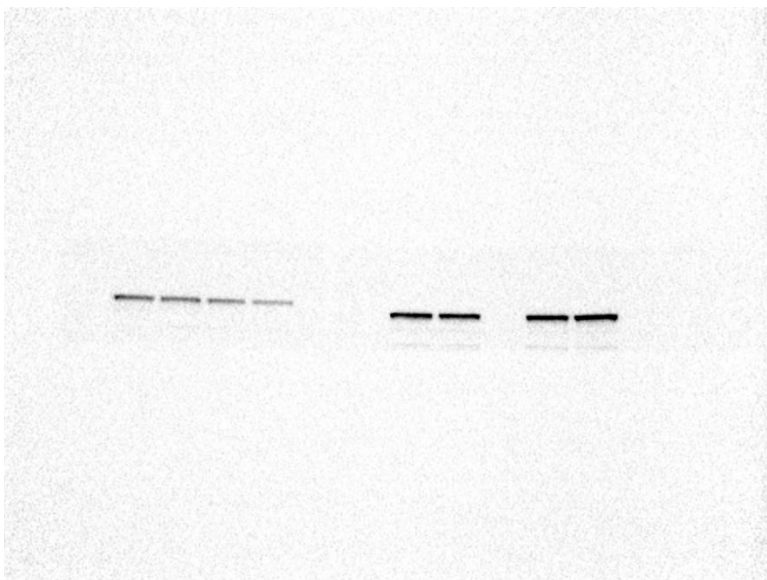

p-BRaf NSL-YHJ-2-27 and NSL-YHJ-2-62

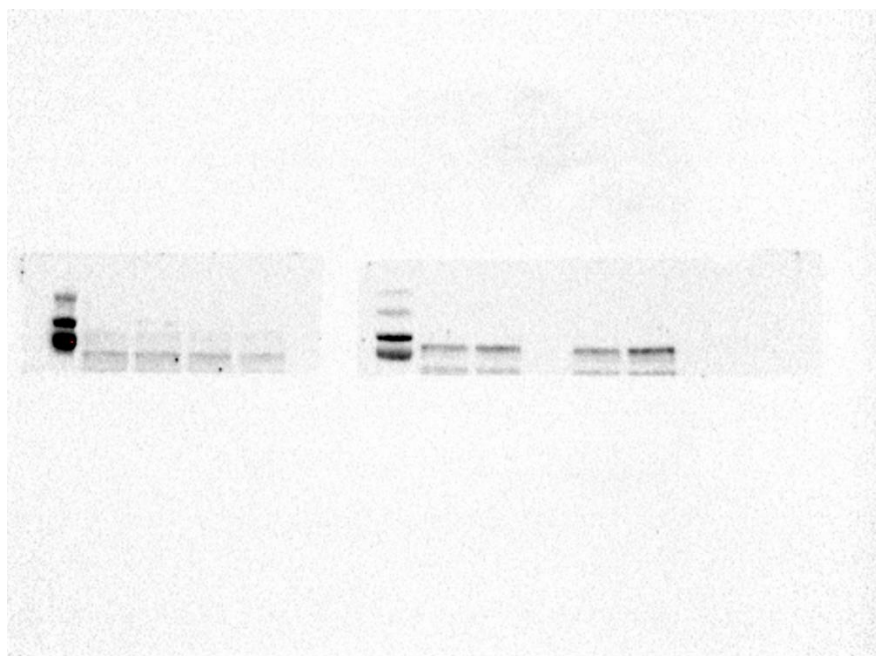

Control

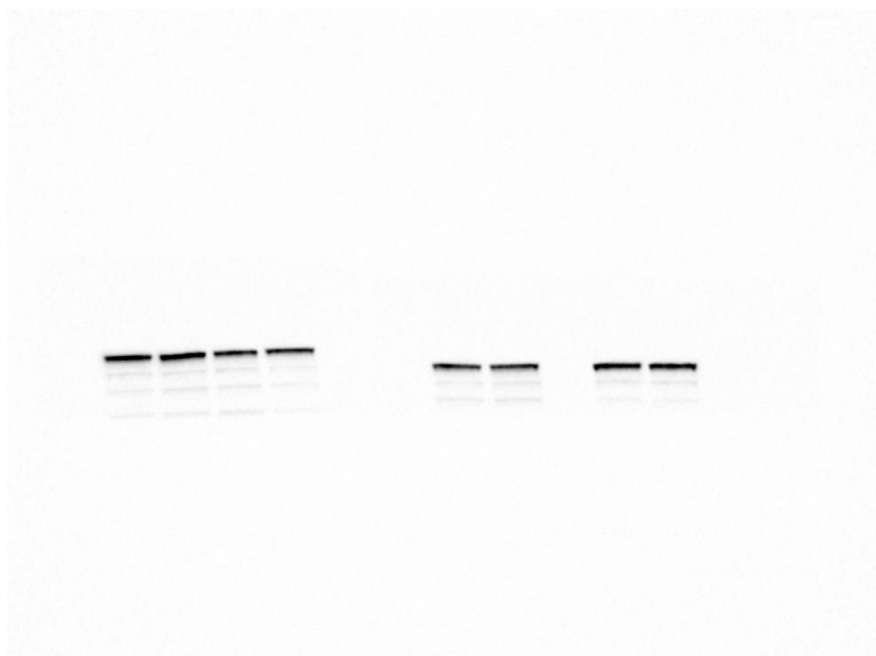

(c)

Total CRaf-NSL-YHJ-2-27

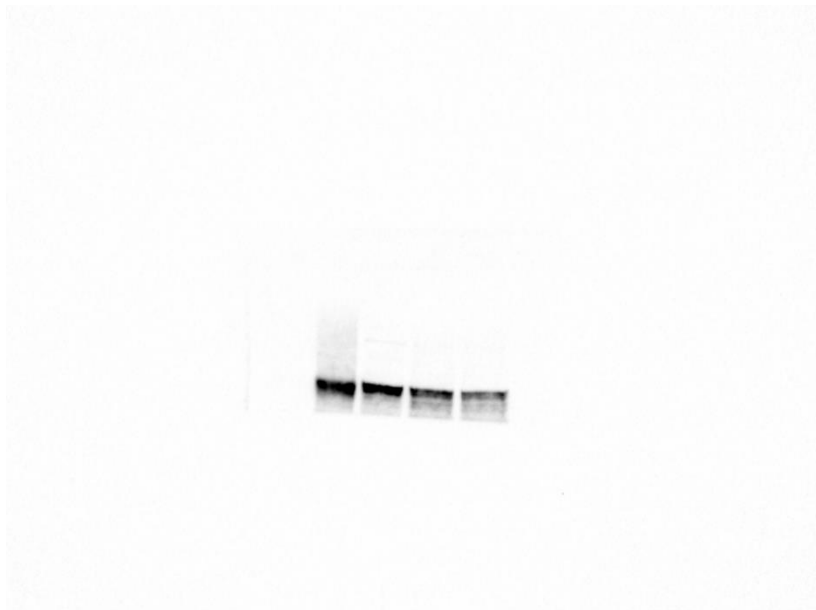

Control

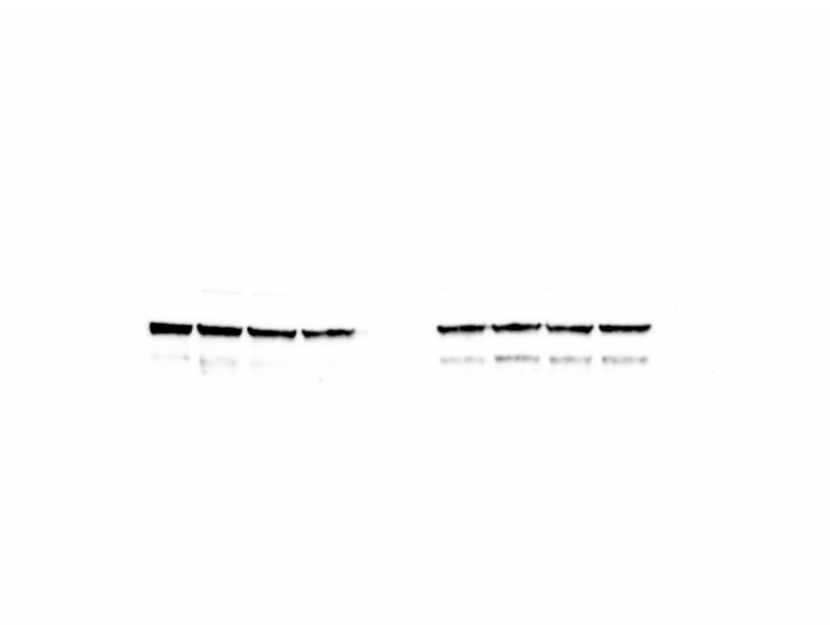

Total CRaf-NSL-YHJ-2-62

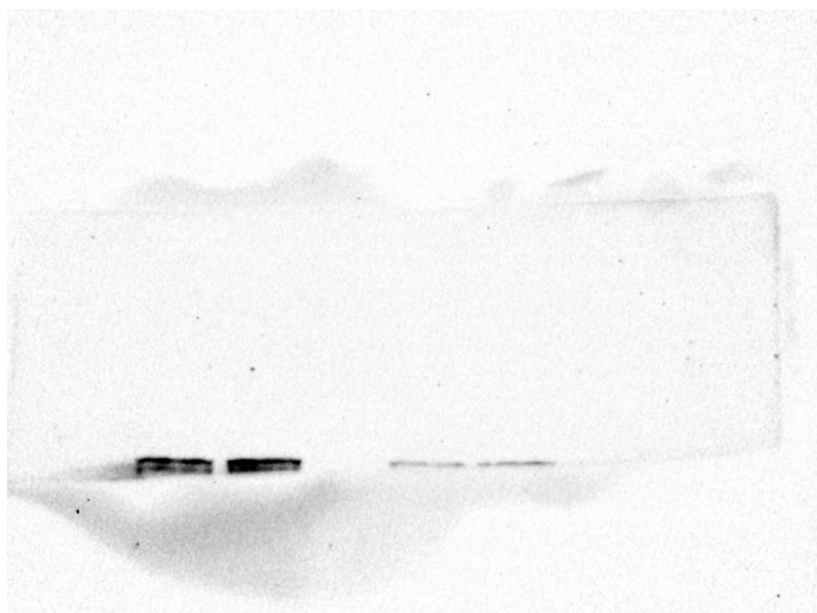

Control

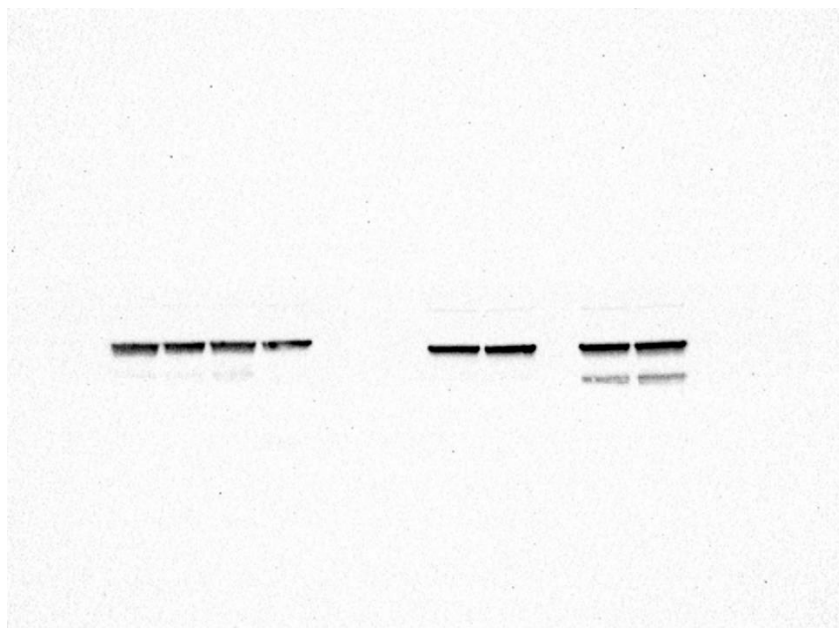

P-Craf-NSL-YHJ-2-27

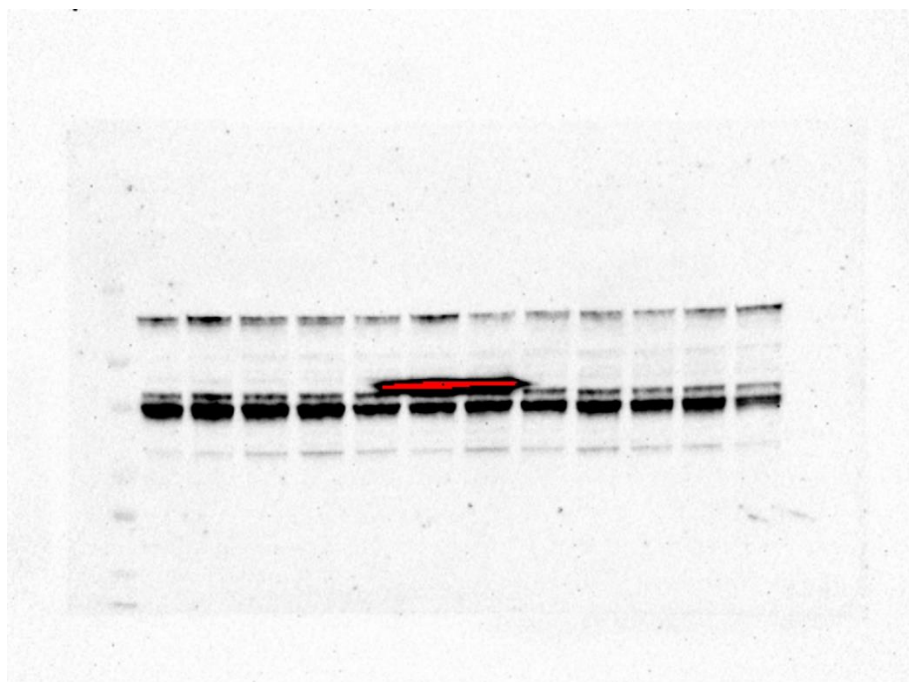

Control

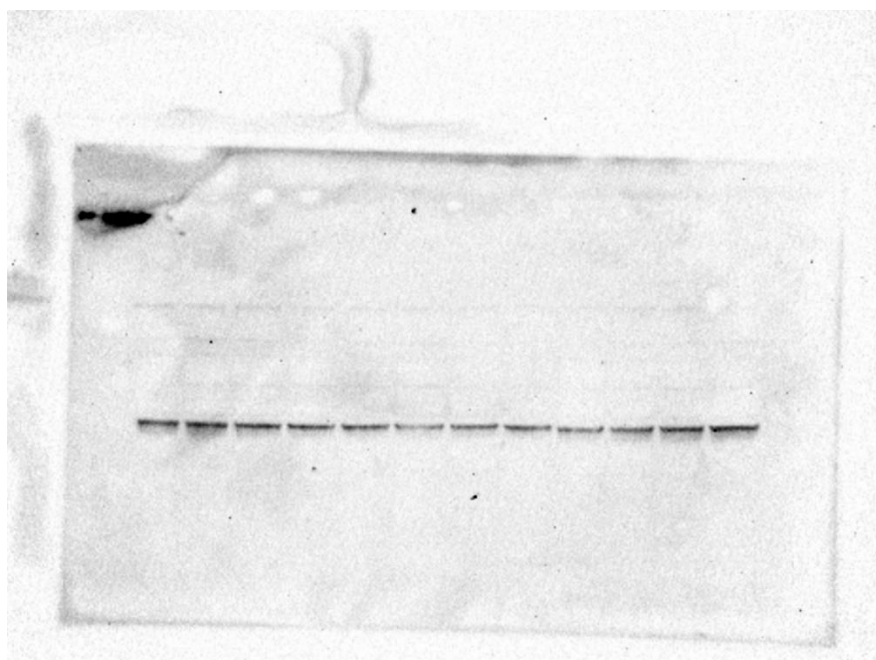

p-CRaf-NSL-YHJ-2-62

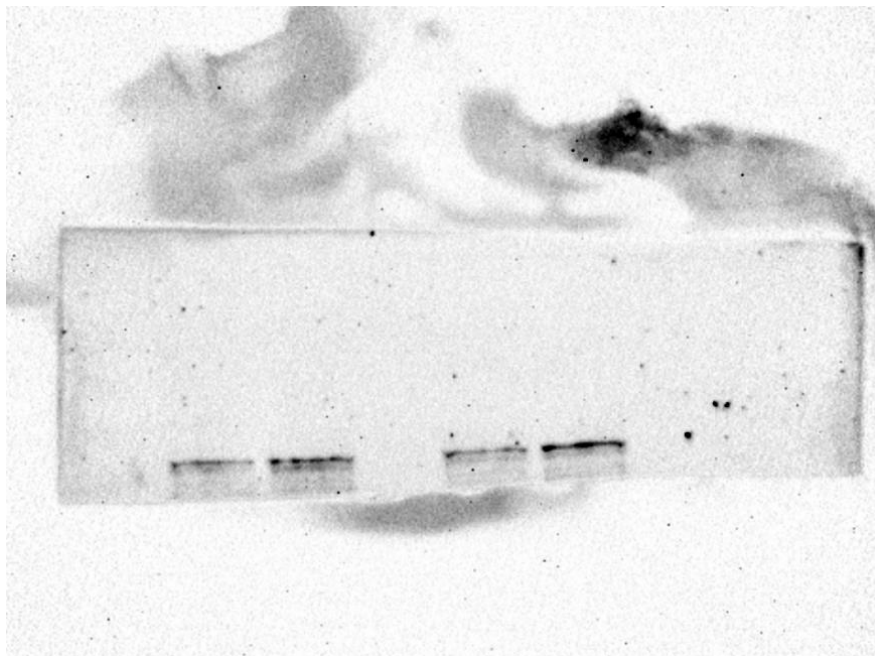

Control

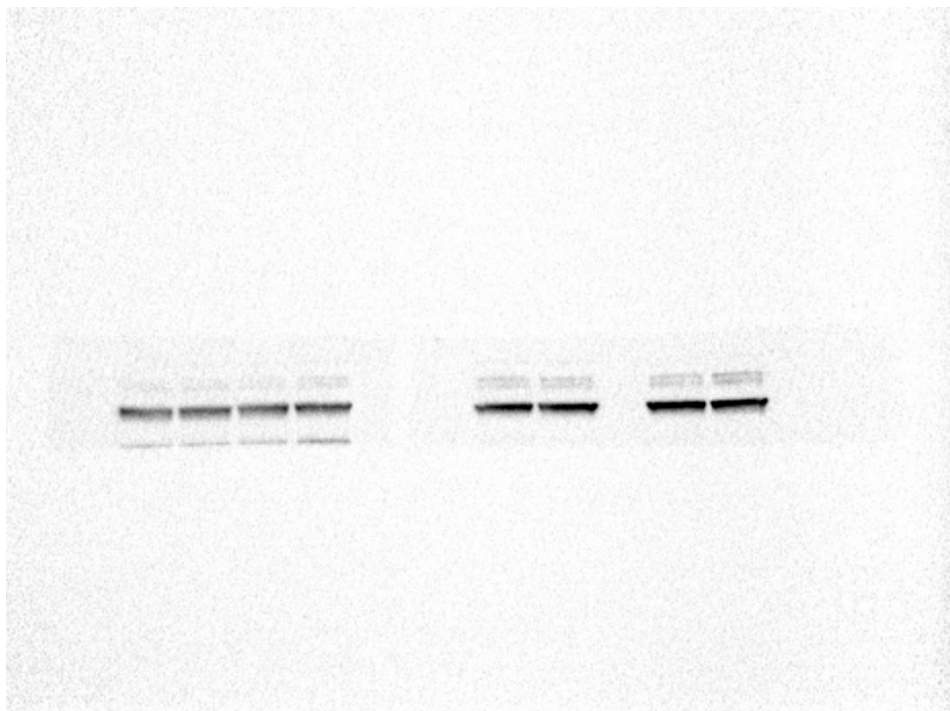

**(D)**

Total MEK1/2-NSL-YHJ-2-27

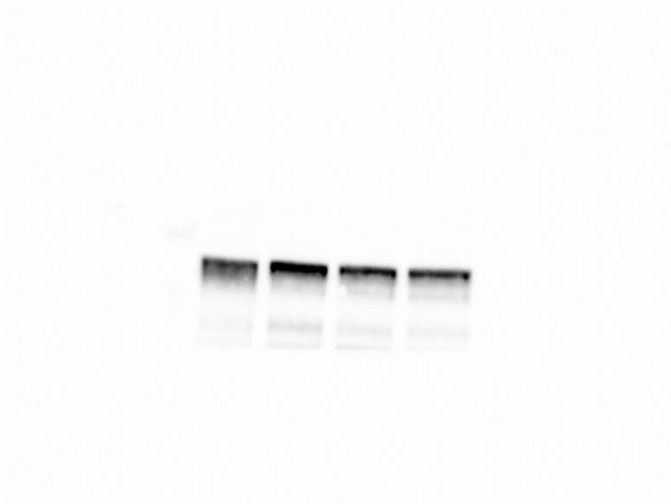

Total BRAF-NSL-YHJ-2-62

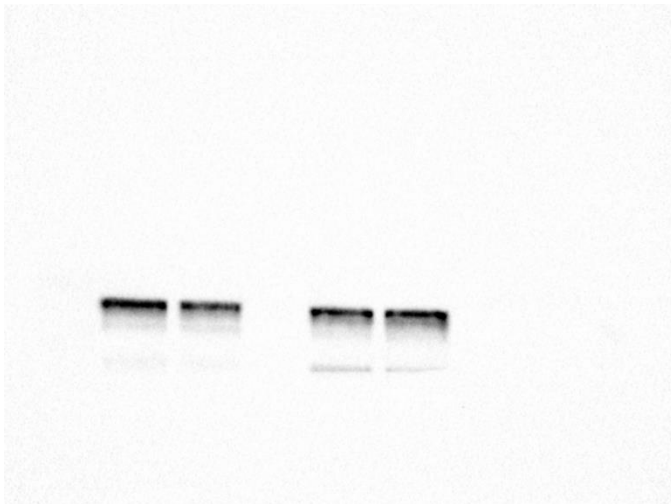



Control

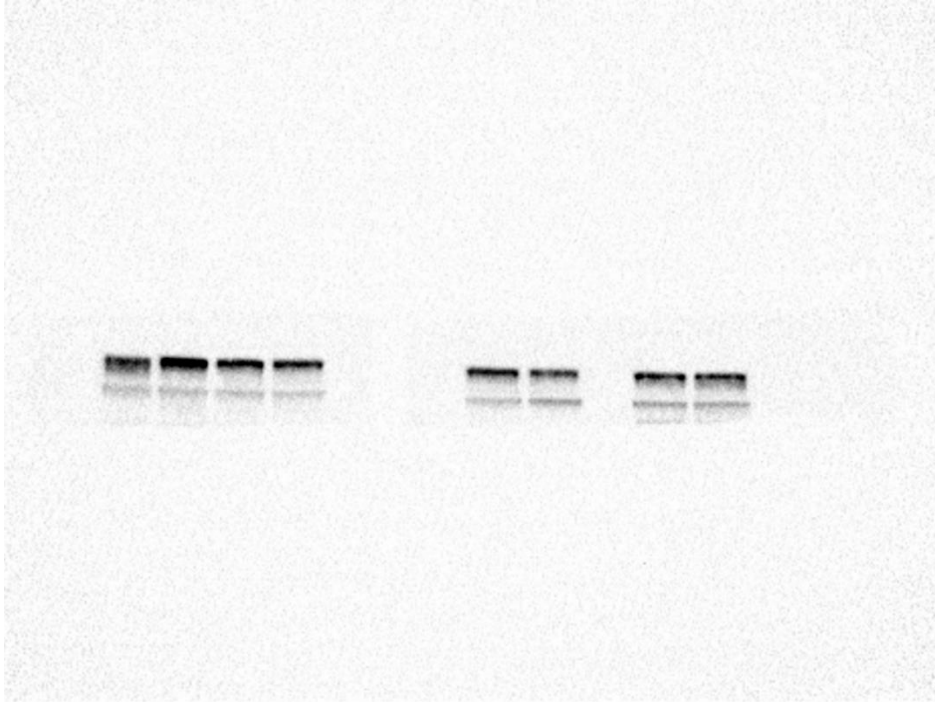

p-MEK1/2-NSL-YHJ-2-27

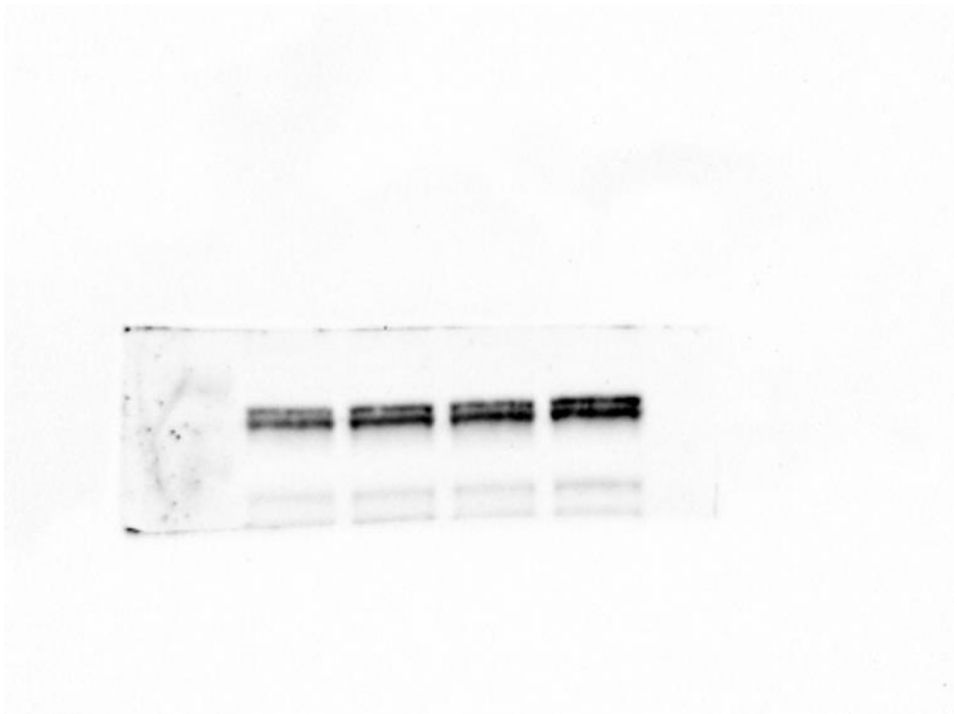

p-MEK1/2-NSL-YHJ-2-62

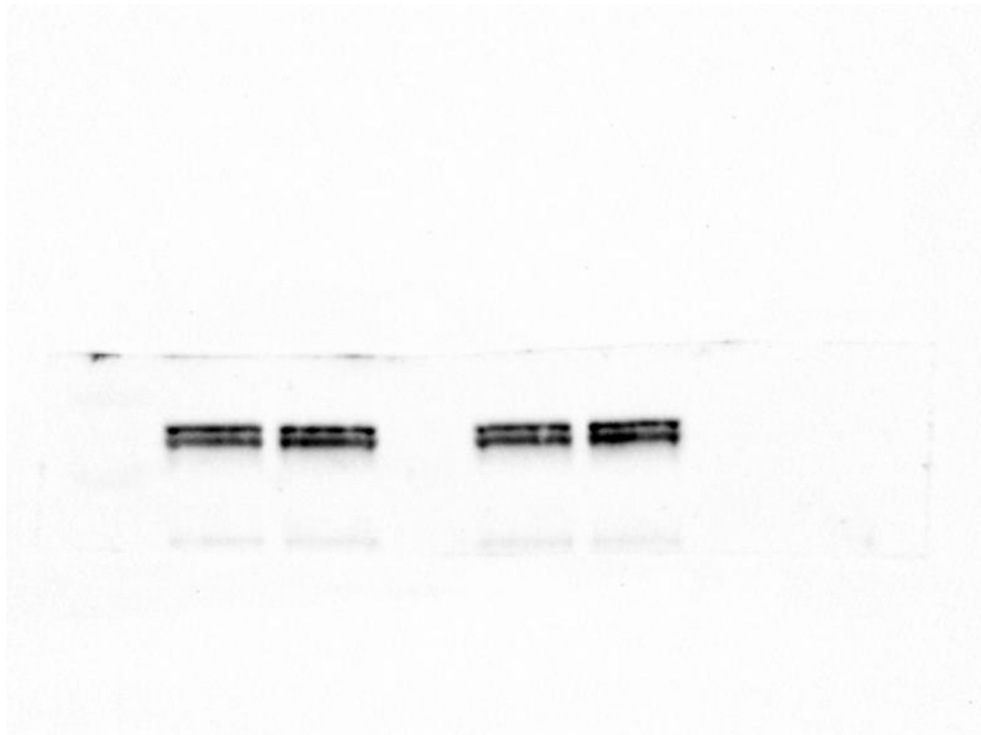

Control

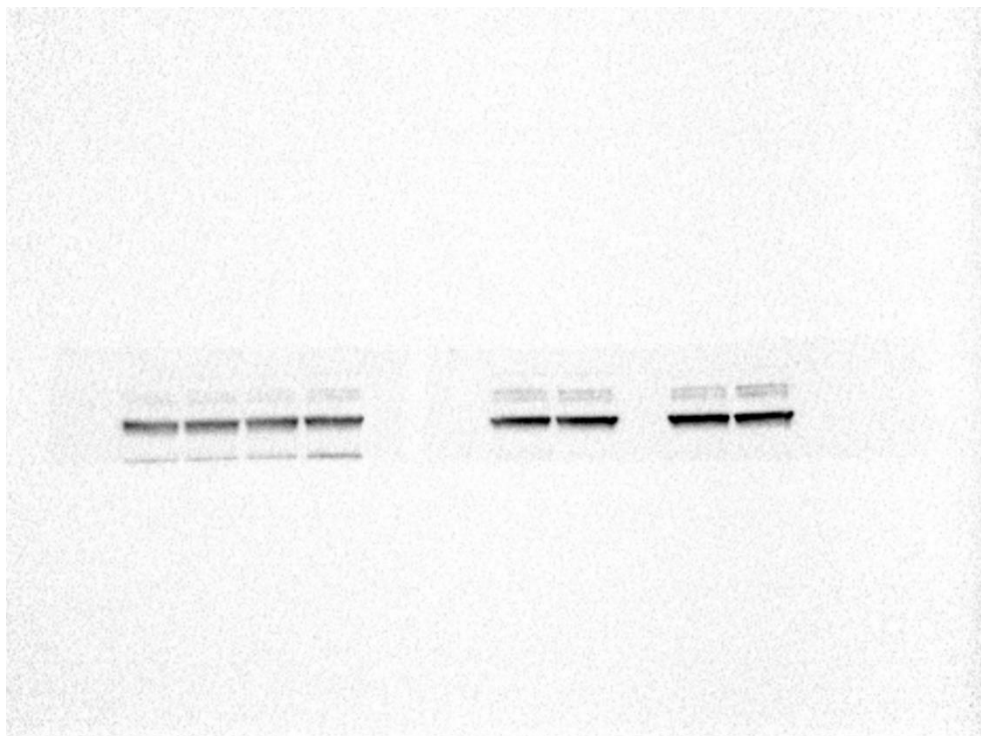

(E)

Total ERK1/2-NSL-YHJ-2-27

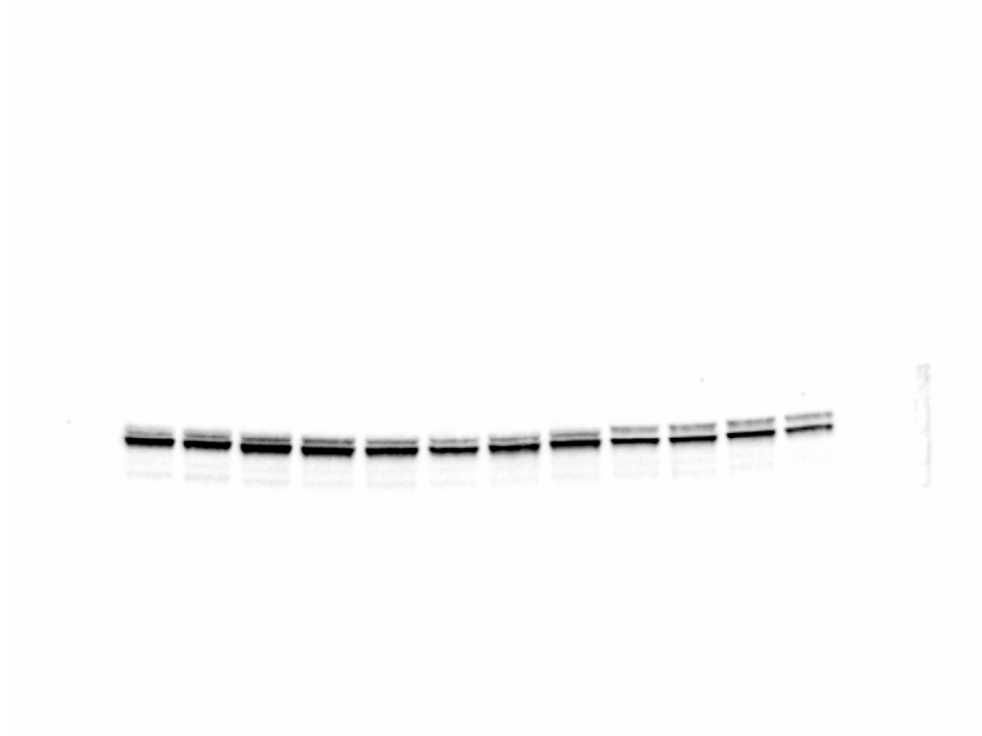

Control

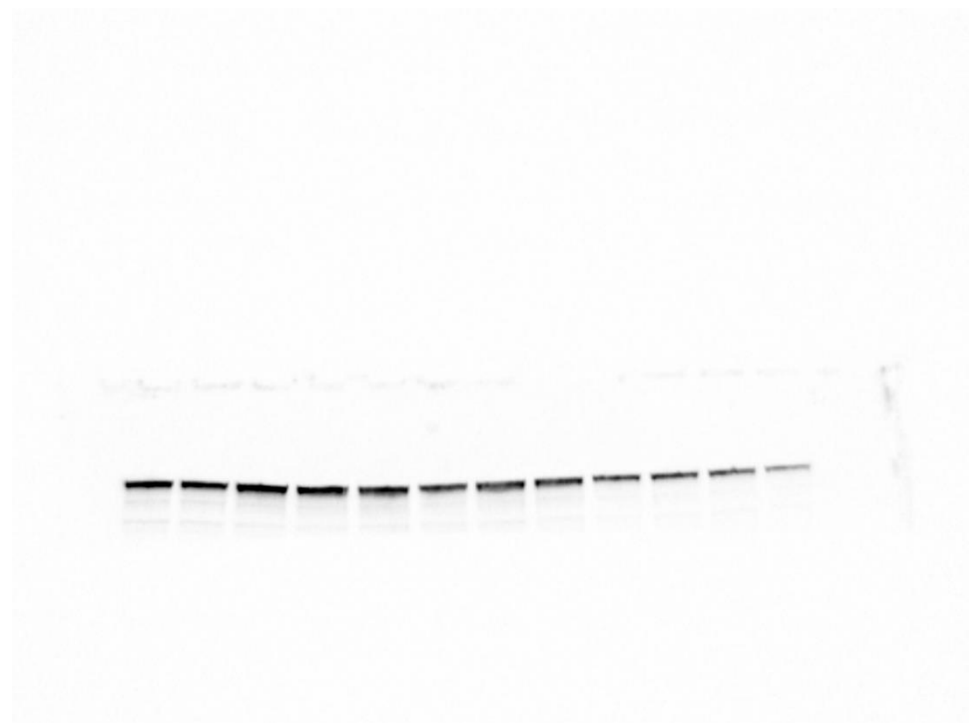

p-ERK1/2-NSL-YHJ-2-27

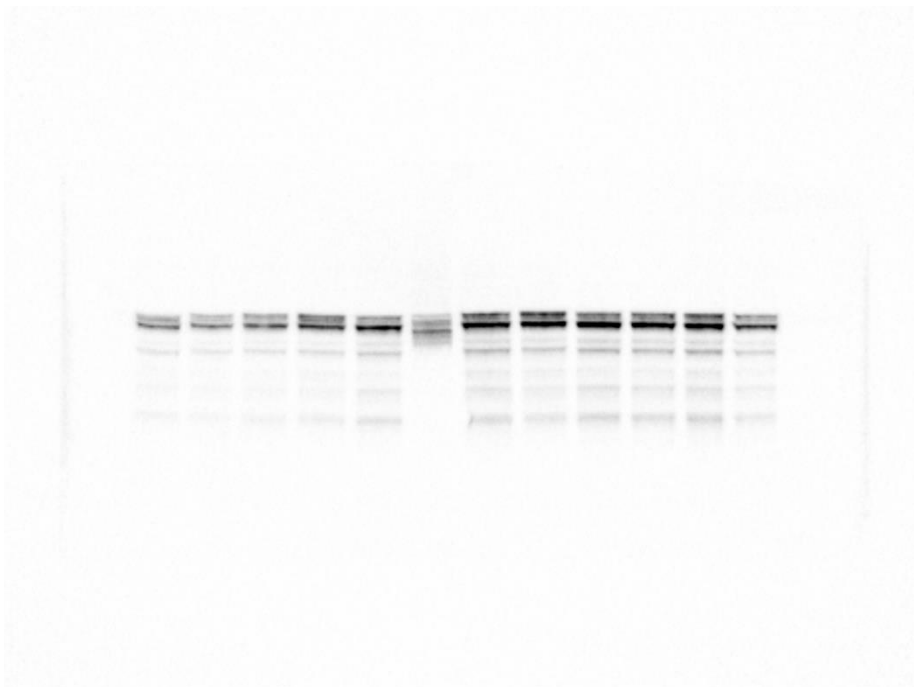

Control

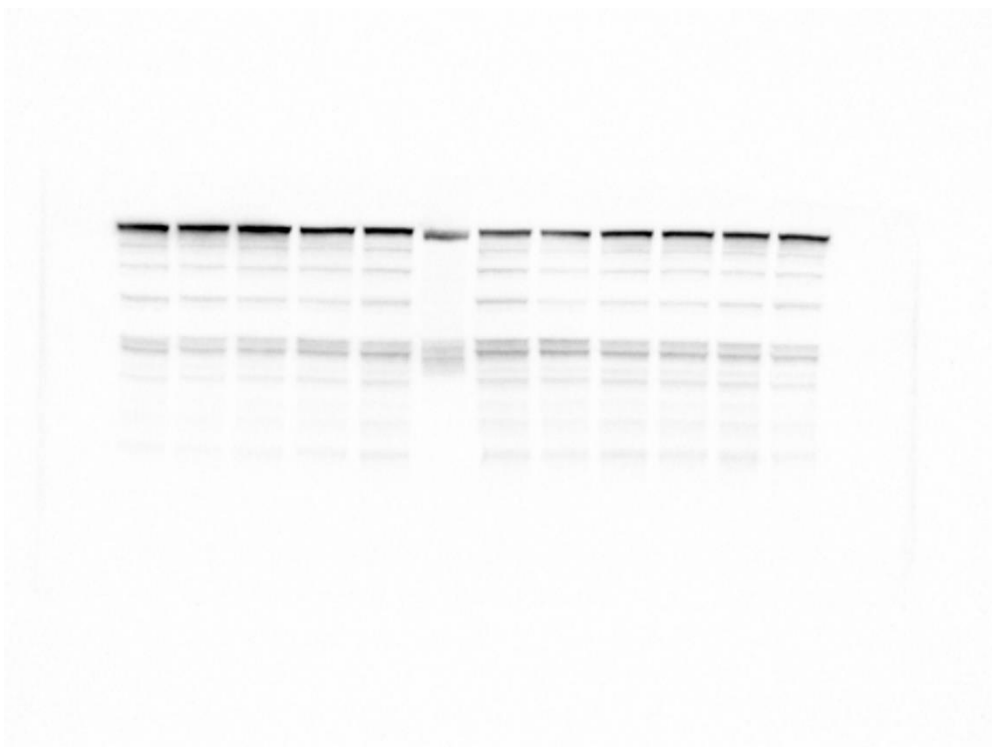

**(F)**

Total RSK1/2/3 NSL-YHJ-2-27 and NSL-YHJ-2-62

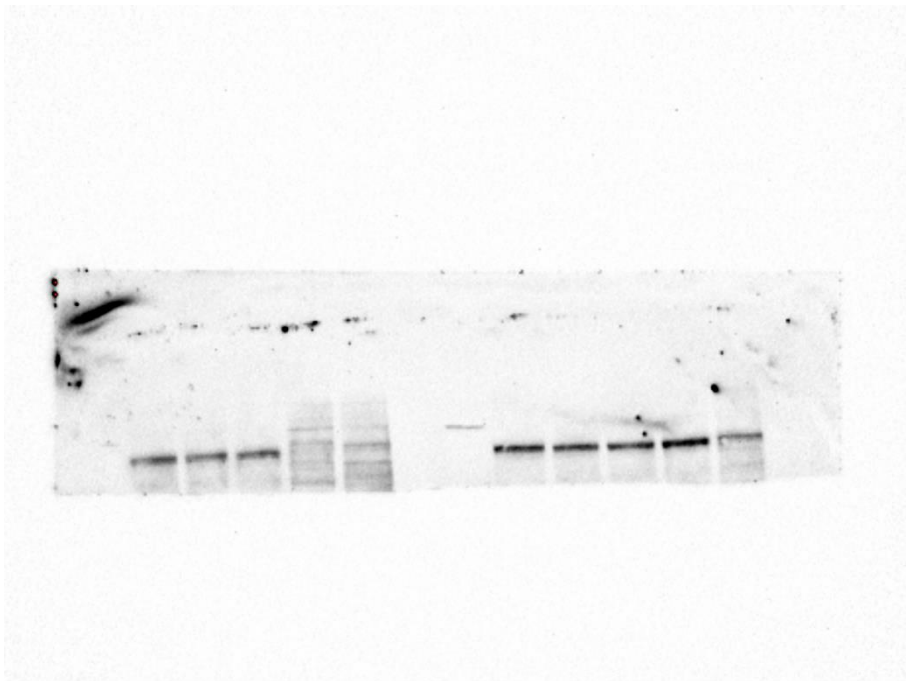

Control

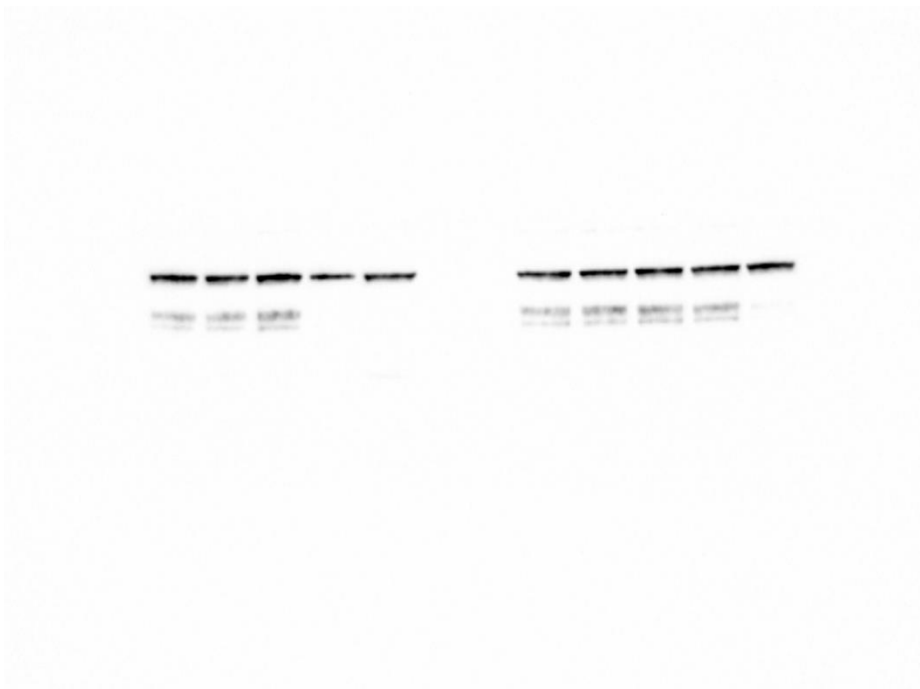

p-p90RSK NSL-YHJ-2-27 and NSL-YHJ-2-62

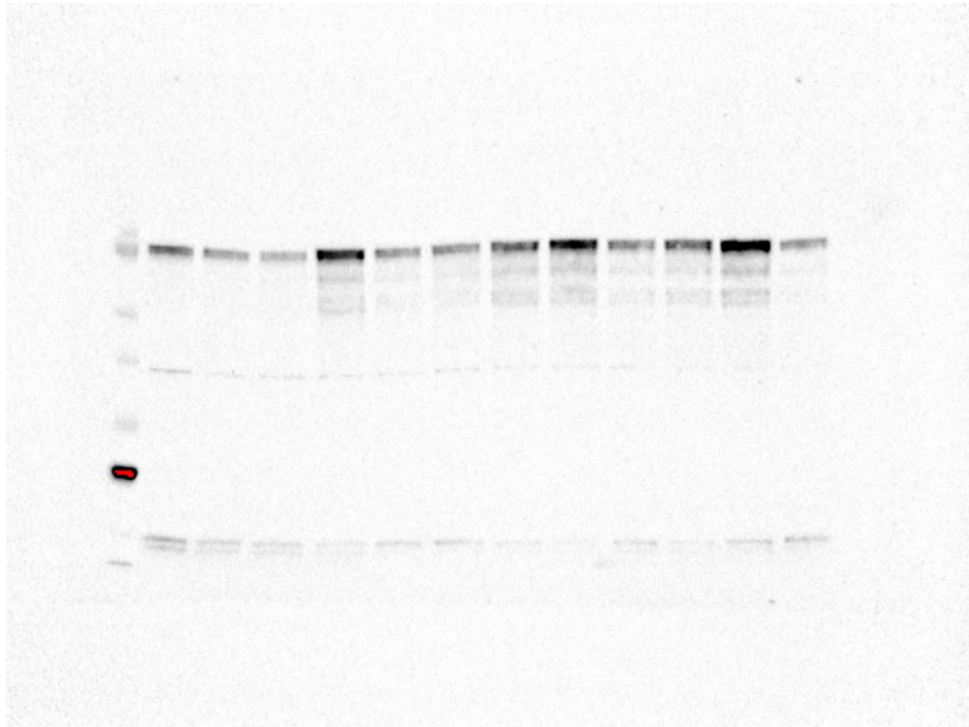

Control

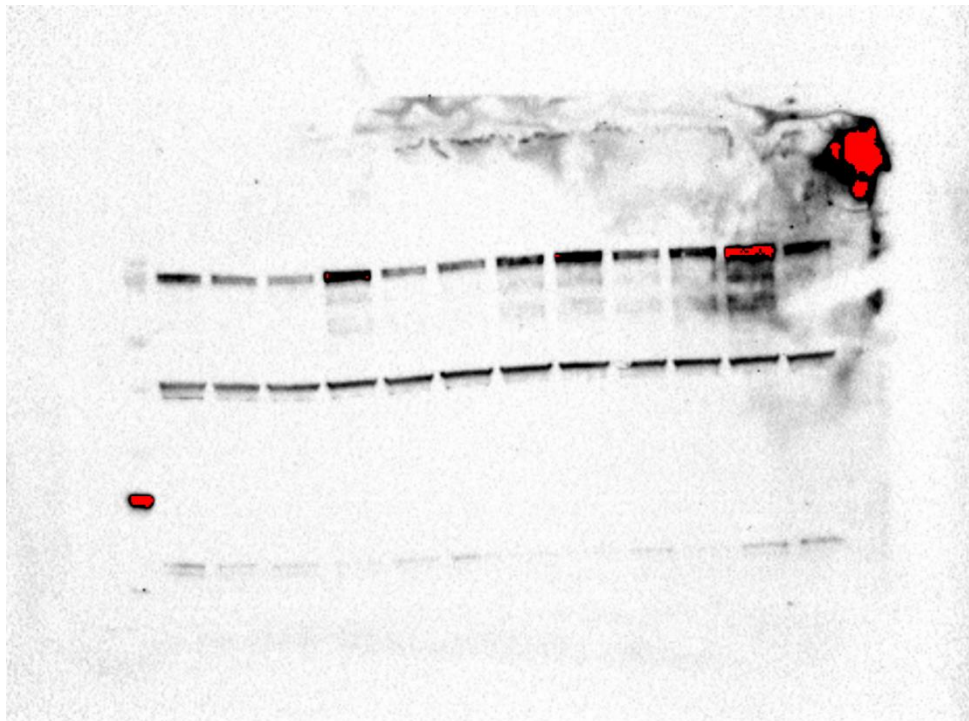

Supplement: s1 [file s1]
